# Supplementary material for: Human Astrovirus 1–8 Seroprevalence Evaluation in a United States Adult Population
Source: MDPI journal article supplement (doi:10.3390/v13060979), 2021-05-25
Supplement: s1 [file s1]

**SUPPLEMENTARY TABLE 1.** Plasma Samples from Discovery Life Sciences

| <i>Internal ID</i> | <i>Patient ID</i> | <i>Sample SKU</i>           | <i>Aliquot Serial</i> | <i>Gender</i> | <i>Age</i> | <i>Race</i> | <i>Ethnicity</i>    | <i>Region</i>       | <i>Sample Draw Date</i> |
|--------------------|-------------------|-----------------------------|-----------------------|---------------|------------|-------------|---------------------|---------------------|-------------------------|
| DLS-1              | 110033775         | BBP0500-A5110033775072514P0 | 173754487             | Male          | 49         | Black       | Non-Hispanic/Latino | Huntsville, AL, USA | 7/25/14                 |
| DLS-2              | 110032786         | BBP0500-A5110032786072313P0 | 150952714             | Male          | 59         | White       | Non-Hispanic/Latino | Huntsville, AL, USA | 7/23/13                 |
| DLS-3              | 110000224         | BBP0500-A5110000224072313P0 | 156150353             | Male          | 66         | White       | Non-Hispanic/Latino | Huntsville, AL, USA | 7/23/13                 |
| DLS-4              | 110027059         | BBP0500-A5110027059110813P0 | 156151663             | Female        | 35         | White       | Non-Hispanic/Latino | Huntsville, AL, USA | 11/8/13                 |
| DLS-5              | 110000219         | BBP0500-A5110000219110713P0 | 156151819             | Male          | 65         | Black       | Non-Hispanic/Latino | Huntsville, AL, USA | 11/7/13                 |
| DLS-6              | 110035404         | BBP0500-A5110035404080613P0 | 150954519             | Male          | 70         | White       | Non-Hispanic/Latino | Huntsville, AL, USA | 8/6/13                  |
| DLS-7              | 110033582         | BBP0500-A5110033582012714P0 | 159302610             | Male          | 38         | White       | Non-Hispanic/Latino | Huntsville, AL, USA | 1/27/14                 |
| DLS-8              | 110000291         | BBP0500-A5110000291012214P0 | 158368339             | Female        | 56         | White       | Hispanic/Latino     | Huntsville, AL, USA | 1/22/14                 |
| DLS-9              | 110027066         | BBP0500-A5110027066110513P0 | 145973823             | Male          | 32         | White       | Non-Hispanic/Latino | Huntsville, AL, USA | 11/5/13                 |
| DLS-10             | 110033642         | BBP0500-A5110033642020514P0 | 159302017             | Female        | 50         | White       | Non-Hispanic/Latino | Huntsville, AL, USA | 2/5/14                  |
| DLS-11             | 110033707         | BBP0500-A5110033707021414P0 | 162046387             | Female        | 36         | White       | Hispanic/Latino     | Huntsville, AL, USA | 2/14/14                 |
| DLS-12             | 110033646         | BBP0500-A5110033646021414P0 | 158386097             | Male          | 39         | White       | Non-Hispanic/Latino | Huntsville, AL, USA | 2/14/14                 |
| DLS-13             | 110027070         | BBP0500-A5110027070080812P0 | 128358537             | Male          | 40         | Black       | Non-Hispanic/Latino | Huntsville, AL, USA | 8/8/12                  |
| DLS-14             | 110035403         | BBP0500-A5110035403081613P0 | 156827302             | Male          | 65         | White       | Hispanic/Latino     | Huntsville, AL, USA | 8/16/13                 |
| DLS-15             | 110033711         | BBP0500-A5110033711030514P0 | 162047215             | Female        | 45         | White       | Non-Hispanic/Latino | Huntsville, AL, USA | 3/5/14                  |
| DLS-16             | 110035415         | BBP0500-A5110035415081313P0 | 152418158             | Male          | 68         | White       | Non-Hispanic/Latino | Huntsville, AL, USA | 8/13/13                 |
| DLS-17             | 110032789         | BBP0500-A5110032789111513P0 | 156152366             | Female        | 23         | White       | Non-Hispanic/Latino | Huntsville, AL, USA | 1/31/14                 |
| DLS-18             | 110035416         | BBP0500-A5110035416100713SH | 141531749             | Male          | 72         | White       | Non-Hispanic/Latino | Huntsville, AL, USA | 10/7/13                 |
| DLS-19             | 110029613         | BBP0500-A5110029613112113P0 | 141502563             | Male          | 56         | Black       | Non-Hispanic/Latino | Huntsville, AL, USA | 11/21/13                |
| DLS-20             | 110033565         | BBP0500-A5110033565112213P0 | 141504119             | Male          | 30         | Asian       | Non-Hispanic/Latino | Huntsville, AL, USA | 11/22/13                |
| DLS-21             | 110033572         | BBP0500-A5110033572112213P0 | 141504164             | Female        | 22         | White       | Hispanic/Latino     | Huntsville, AL, USA | 11/22/13                |
| DLS-22             | 110033569         | BBP0500-A5110033569112213P0 | 141504138             | Male          | 35         | White       | Hispanic/Latino     | Huntsville, AL, USA | 11/22/13                |
| DLS-23             | 110000296         | BBP0500-A5110000296071913P0 | 149460809             | Male          | 53         | White       | Non-Hispanic/Latino | Huntsville, AL, USA | 7/19/13                 |
| DLS-24             | 110029648         | BBP0500-A5110029648110613P0 | 145974097             | Male          | 66         | Black       | Non-Hispanic/Latino | Huntsville, AL, USA | 11/6/13                 |
| DLS-25             | 110033618         | BBP0500-A5110033618022014P0 | 162046318             | Female        | 28         | Other       | Non-Hispanic/Latino | Huntsville, AL, USA | 2/20/14                 |
| DLS-26             | 110033587         | BBP0500-A5110033587121313P0 | 158367340             | Female        | 28         | Black       | Non-Hispanic/Latino | Huntsville, AL, USA | 12/13/13                |
| DLS-27             | 110033761         | BBP0500-A5110033761061914P0 | 174556350             | Male          | 25         | Black       | Non-Hispanic/Latino | Huntsville, AL, USA | 6/19/14                 |
| DLS-28             | 110033765         | BBP0500-A5110033765062314P0 | 174555855             | Female        | 34         | White       | Non-Hispanic/Latino | Huntsville, AL, USA | 6/23/14                 |
| DLS-29             | 110033735         | BBP0500-A5110033735041414P0 | 162034611             | Female        | 41         | Black       | Non-Hispanic/Latino | Huntsville, AL, USA | 4/14/14                 |
| DLS-30             | 110033918         | BBP0500-A5110033918092214P0 | 176336325             | Female        | 39         | Asian       | Non-Hispanic/Latino | Huntsville, AL, USA | 9/22/14                 |
| DLS-31             | 110029632         | BBP0500-A5110029632071713P0 | 149460542             | Male          | 78         | White       | Non-Hispanic/Latino | Huntsville, AL, USA | 7/17/13                 |
| DLS-32             | 110027067         | BBP0500-A5110027067101716P0 | 219566034             | Male          | 50         | White       | Non-Hispanic/Latino | Huntsville, AL, USA | 10/17/16                |
| DLS-33             | 110036064         | BBP0500-A5110036064112315P0 | 202006509             | Male          | 20         | Black       | Non-Hispanic/Latino | Huntsville, AL, USA | 11/23/15                |
| DLS-34             | 110036542         | BBP0500-Z1110036542020916SH | 202065896             | Female        | 22         | White       | Non-Hispanic/Latino | Huntsville, AL, USA | 2/9/16                  |
| DLS-35             | 110000239         | BBP0500-A5110000239111113P0 | 145973691             | Female        | 63         | White       | Non-Hispanic/Latino | Huntsville, AL, USA | 11/11/13                |
| DLS-36             | 110033246         | BBP0500-A5110033246072513P0 | 150953001             | Male          | 52         | White       | Hispanic/Latino     | Huntsville, AL, USA | 7/25/13                 |

|        |           |                             |           |        |    |                 |                     |                     |          |
|--------|-----------|-----------------------------|-----------|--------|----|-----------------|---------------------|---------------------|----------|
| DLS-37 | 110000267 | BBP0500-A5110000267080912P0 | 128359003 | Male   | 63 | White           | Unknown             | Huntsville, AL, USA | 8/9/12   |
| DLS-38 | 110033586 | BBP0500-A5110033586121113P0 | 158366754 | Female | 30 | White           | Non-Hispanic/Latino | Huntsville, AL, USA | 12/11/13 |
| DLS-39 | 110033594 | BBP0500-A5110033594121113P0 | 158366732 | Female | 22 | White           | Non-Hispanic/Latino | Huntsville, AL, USA | 12/11/13 |
| DLS-40 | 110029622 | BBP0500-A5110029622011314P0 | 159304314 | Female | 56 | White           | Non-Hispanic/Latino | Huntsville, AL, USA | 1/13/14  |
| DLS-41 | 110033624 | BBP0500-A5110033624011714P0 | 159301735 | Male   | 55 | White           | Non-Hispanic/Latino | Huntsville, AL, USA | 1/17/14  |
| DLS-42 | 110033395 | BBP0500-A5110033395111313P0 | 145973555 | Female | 29 | Black           | Non-Hispanic/Latino | Huntsville, AL, USA | 11/13/13 |
| DLS-43 | 110033584 | BBP0500-A5110033584120613P0 | 158366873 | Female | 28 | Black           | Non-Hispanic/Latino | Huntsville, AL, USA | 12/6/13  |
| DLS-44 | 110033643 | BBP0500-A5110033643020414P0 | 159302402 | Male   | 22 | White           | Hispanic/Latino     | Huntsville, AL, USA | 2/4/14   |
| DLS-45 | 110033590 | BBP0500-A5110033590010814P0 | 158386007 | Female | 25 | White           | Non-Hispanic/Latino | Huntsville, AL, USA | 1/8/14   |
| DLS-46 | 110000293 | BBP0500-A5110000293011014P0 | 159303362 | Male   | 29 | White           | Non-Hispanic/Latino | Huntsville, AL, USA | 1/10/14  |
| DLS-47 | 110033585 | BBP0500-A5110033585010314P0 | 158369210 | Male   | 20 | White           | Non-Hispanic/Latino | Huntsville, AL, USA | 1/3/14   |
| DLS-48 | 110033622 | BBP0500-A5110033622010214P0 | 158366769 | Male   | 29 | Black           | Non-Hispanic/Latino | Huntsville, AL, USA | 1/2/14   |
| DLS-49 | 110033640 | BBP0500-A5110033640012914P0 | 159303038 | Male   | 43 | Asian           | Non-Hispanic/Latino | Huntsville, AL, USA | 1/29/14  |
| DLS-50 | 110033626 | BBP0500-A5110033626123013P0 | 158385555 | Male   | 19 | White           | Non-Hispanic/Latino | Huntsville, AL, USA | 12/30/13 |
| DLS-51 | 110033628 | BBP0500-A5110033628123113P0 | 158369324 | Female | 25 | White           | Non-Hispanic/Latino | Huntsville, AL, USA | 12/31/13 |
| DLS-52 | 110033570 | BBP0500-A5110033570010314P0 | 158369292 | Female | 26 | White           | Non-Hispanic/Latino | Huntsville, AL, USA | 1/3/14   |
| DLS-53 | 110033632 | BBP0500-A5110033632011514P0 | 159301330 | Female | 30 | American Indian | Non-Hispanic/Latino | Huntsville, AL, USA | 1/15/14  |
| DLS-54 | 110033235 | BBP0500-A5110033235121913P0 | 158385538 | Female | 21 | White           | Non-Hispanic/Latino | Huntsville, AL, USA | 12/19/13 |
| DLS-55 | 110033621 | BBP0500-A5110033621122713P0 | 158386170 | Female | 26 | American Indian | Non-Hispanic/Latino | Huntsville, AL, USA | 12/27/13 |
| DLS-56 | 110033770 | BBP0500-A5110033770062514P0 | 174555254 | Female | 33 | White           | Non-Hispanic/Latino | Huntsville, AL, USA | 6/25/14  |
| DLS-57 | 110033747 | BBP0500-A5110033747050514P0 | 158382857 | Female | 48 | Black           | Non-Hispanic/Latino | Huntsville, AL, USA | 5/5/14   |
| DLS-58 | 110033767 | BBP0500-A5110033767070714P0 | 174555619 | Female | 44 | Black           | Non-Hispanic/Latino | Huntsville, AL, USA | 7/7/14   |
| DLS-59 | 110033243 | BBP0500-A5110033243052214P0 | 162047964 | Female | 38 | Black           | Non-Hispanic/Latino | Huntsville, AL, USA | 5/22/14  |
| DLS-60 | 110033759 | BBP0500-A5110033759061714P0 | 174556297 | Female | 40 | Black           | Non-Hispanic/Latino | Huntsville, AL, USA | 6/17/14  |
| DLS-61 | 110033644 | BBP0500-A5110033644061214P0 | 173753188 | Female | 32 | Black           | Non-Hispanic/Latino | Huntsville, AL, USA | 6/12/14  |
| DLS-62 | 110033721 | BBP0500-A5110033721043014P0 | 162047783 | Female | 27 | Black           | Non-Hispanic/Latino | Huntsville, AL, USA | 4/30/14  |
| DLS-63 | 110033915 | BBP0500-A5110033915082814P0 | 176337760 | Male   | 43 | Black           | Non-Hispanic/Latino | Huntsville, AL, USA | 8/28/14  |
